# Supplementary material for: Effect of Vitamin D Status on Vascular Function of the Aorta in a Rat Model of PCOS
Source: Hindawi journal article supplement (doi:10.1155/2021/8865979), 2021-01-01
Supplement: f1 [file 8865979.f1.pdf]

Norepinephrine

T-D+

|             |        |       |       |       |       |       |        |        |       |        |       |
|-------------|--------|-------|-------|-------|-------|-------|--------|--------|-------|--------|-------|
| 0,000000001 | 2,05   | 1,46  | 3,73  | 2,32  | 1,55  | 2,5   | 3,93   | 3,69   | 3,14  | 4,09   | 1,5   |
| 0,00000001  | 46,68  | 1,73  | 17,13 | 13,54 | 17,55 | 12,21 | 68,73  | 49,93  | 32,3  | 48,35  | 27,81 |
| 0,0000001   | 88,41  | 19,39 | 46,05 | 53,62 | 63,2  | 47,01 | 105,31 | 100,7  | 74,67 | 104,22 | 78,19 |
| 0,000001    | 102,57 | 71,54 | 53,78 | 76,67 | 74,79 | 51,99 | 108,32 | 113,68 | 90,77 | 117,7  | 93,15 |

T+D+

|             |        |          |  |          |          |          |          |          |          |          |
|-------------|--------|----------|--|----------|----------|----------|----------|----------|----------|----------|
| 0,000000001 | 1,3999 | 4,138077 |  | 1,974426 | 0,943506 | 1,037046 | 2,147511 | 2,378902 | 2,218349 | 2,603735 |
| 0,00000001  | 16,122 | 21,11826 |  | 22,91017 | 9,434398 | 7,441068 | 10,80213 | 49,28359 | 46,58817 | 33,13754 |
| 0,0000001   | 38,195 | 51,84838 |  | 66,63312 | 42,35441 | 38,27365 | 39,95555 | 100,961  | 98,47553 | 67,83414 |
| 0,000001    | 50,36  | 57,29326 |  | 77,42604 | 55,348   | 56,55    | 62,20832 | 105,4222 | 107,851  | 75,99998 |

T-D-

|             |        |          |         |          |          |          |          |          |          |          |          |
|-------------|--------|----------|---------|----------|----------|----------|----------|----------|----------|----------|----------|
| 0,000000001 | 11,748 | 2,2311   | 3,64228 | 0,935349 | 4,315936 | 4,159046 | 8,927423 | 4,290664 | 2,218359 | 3,631802 | 68,52409 |
| 0,00000001  | 64,72  | 34,64681 | 53,4548 | 5,724834 | 39,16357 | 46,75808 | 22,07697 | 12,50376 | 14,13543 | 85,64683 | 87,59535 |
| 0,0000001   | 107,44 | 85,53695 | 95,7371 | 45,78117 | 67,73138 | 82,24044 | 69,71084 | 53,93257 | 51,33629 | 125,8188 | 106,1995 |
| 0,000001    | 118,76 | 95,81761 | 107,862 | 62,39953 | 74,66886 | 87,62147 | 82,31056 | 87,30571 | 68,30226 | 130,9118 | 113,1533 |

T+D-

|             |        |          |         |          |          |          |          |          |          |          |          |
|-------------|--------|----------|---------|----------|----------|----------|----------|----------|----------|----------|----------|
| 0,000000001 | 0,9263 | 2,433002 | 2,90817 | 12,60804 | 2,803836 | 9,007764 | 4,274011 | 2,643042 | 2,537549 | 5,502835 | 1,924306 |
| 0,00000001  | 36,051 | 19,57453 | 50,5915 | 65,37479 | 47,5197  | 32,23022 | 36,84947 | 26,80526 | 39,22311 | 42,15329 | 31,36639 |
| 0,0000001   | 94,039 | 64,18736 | 94,1922 | 104,4479 | 87,83366 | 54,61631 | 85,40273 | 72,57017 | 77,18524 | 75,76622 | 58,49562 |
| 0,000001    | 109,57 | 81,61174 | 102,004 | 111,8521 | 98,15797 | 60,29825 | 88,65958 | 69,36006 | 84,86961 | 79,7436  | 60,78066 |

Acetylcholine

T-D+

|            |          |         |          |          |          |         |          |          |          |         |          |
|------------|----------|---------|----------|----------|----------|---------|----------|----------|----------|---------|----------|
| 0,00000001 | 6,077662 | 10,5041 | 33,66238 | 28,55866 | 7,023885 | 4,43558 | 10,94827 | 4,741466 | 2,1633   | 6,46564 | 7,399044 |
| 0,0000001  | 27,93126 | 74,4192 | 60,4621  | 57,76851 | 43,72097 | 58,5163 | 52,78579 | 38,86709 | 39,91833 | 38,1647 | 51,89775 |
| 0,000001   | 52,67752 | 92,8411 | 80,71695 | 79,18879 | 69,47298 | 82,3862 | 70,04791 | 58,11267 | 59,44892 | 59,9741 | 74,87692 |
| 0,00001    | 62,83342 | 95,0137 | 93,44021 | 78,70527 | 73,04596 | 86,0504 | 73,66676 | 60,30987 | 59,75019 | 60,2215 | 79,57315 |

T+D+

|            |          |         |          |          |          |         |          |          |          |
|------------|----------|---------|----------|----------|----------|---------|----------|----------|----------|
| 0,00000001 | 16,91007 | 29,3381 | 5,039414 | 30,51845 | 11,89473 | 3,09935 | 11,76515 | 13,37427 | 16,91416 |
| 0,0000001  | 60,13056 | 79,3437 | 45,46367 | 78,27789 | 52,7556  | 41,1713 | 56,26077 | 50,17835 | 48,40058 |
| 0,000001   | 83,07041 | 81,529  | 79,55375 | 93,11218 | 68,76038 | 70,6471 | 69,81823 | 78,06032 | 73,32739 |
| 0,00001    | 93,7649  | 95,9646 | 80,61541 | 94,80568 | 66,94091 | 75,0274 | 71,55312 | 82,00001 | 79,34657 |

T-D-

|            |          |         |          |          |          |         |          |          |          |         |          |
|------------|----------|---------|----------|----------|----------|---------|----------|----------|----------|---------|----------|
| 0,00000001 | 1,690172 | 5,07561 | 0,560354 | 10,55858 | 15,84134 | 6,71849 | 4,899737 | 11,45202 | 15,79584 | 26,1339 | 2,284473 |
| 0,0000001  | 21,39256 | 10,6655 | 10,049   | 24,66855 | 33,99847 | 17,3013 | 32,45667 | 31,3105  | 26,02483 | 37,3494 | 14,5753  |
| 0,000001   | 48,49381 | 25,888  | 29,43152 | 68,56424 | 72,41351 | 45,0574 | 60,88442 | 69,24762 | 54,12332 | 62,79   | 31,81655 |
| 0,00001    | 55,21105 | 34,1181 | 44,95043 | 84,074   | 83,67659 | 48,94   | 63,87927 | 85,52052 | 58,24117 | 67,6459 | 33,57454 |

T+D-

|            |          |         |          |          |          |         |          |          |          |         |          |
|------------|----------|---------|----------|----------|----------|---------|----------|----------|----------|---------|----------|
| 0,00000001 | 1,000591 | 9,1793  | 6,614483 | 6,448299 | 4,89302  | 34,3868 | 4,358762 | 11,84966 | 9,535407 | 1,79667 | 11,07053 |
| 0,0000001  | 1,000591 | 50,3453 | 18,65369 | 45,39919 | 29,12942 | 74,1041 | 28,44016 | 62,9083  | 50,46432 | 21,1982 | 34,53671 |
| 0,000001   | 17,79635 | 69,3937 | 53,58005 | 62,06414 | 45,78144 | 86,4667 | 60,60899 | 77,44651 | 66,92141 | 54,9411 | 48,83943 |
| 0,00001    | 26,71293 | 69,4503 | 59,90964 | 62,99719 | 46,19708 | 90,5756 | 54,46274 | 72,60488 | 71,09735 | 53,8682 | 45,94893 |

Insulin

T-D+

|     |           |          |          |          |          |          |          |          |
|-----|-----------|----------|----------|----------|----------|----------|----------|----------|
| 30  | 5,163776* | 20,70305 | 22,49085 | 31,56644 | 26,49995 | 38,71764 | 31,00746 | 25,32481 |
| 120 | -9,27082* | 37,45252 | 43,78898 | 49,6201  | 42,65384 | 53,39867 | 45,54136 | 41,6705  |
| 300 | -13,8748* | 36,94065 | 61,4416  | 60,82725 | 54,09022 | 67,20726 | 57,48351 | 54,48173 |
| 600 | -23,5846* | 35,44585 | 62,46941 | 74,8226  | 67,24365 | 75,06681 | 65,6118  | 72,75156 |

T+D+

|     |          |          |          |          |          |          |          |          |          |          |
|-----|----------|----------|----------|----------|----------|----------|----------|----------|----------|----------|
| 30  | 25,25796 | 50,05081 | 49,76201 | 47,37536 | 36,50656 | 9,434648 | 37,41886 | 21,57306 | 22,1314  | 1,731258 |
| 120 | 22,84788 | 64,06387 | 73,59828 | 63,08035 | 50,15887 | 19,68206 | 50,95996 | 34,24834 | 32,82592 | 7,635484 |
| 300 | 25,72169 | 67,87242 | 77,82352 | 69,68426 | 51,02906 | 27,96448 | 62,73811 | 44,93534 | 33,54958 | 17,80262 |
| 600 | 25,25796 | 74,53221 | 85,15953 | 78,3334  | 36,31379 | 41,69456 | 108,6797 | 58,40604 | 25,89291 | 33,59375 |

T-D-

|     |          |           |          |          |          |          |          |          |          |          |
|-----|----------|-----------|----------|----------|----------|----------|----------|----------|----------|----------|
| 30  | 5,249744 | 16,18509* | 13,06804 | 13,23874 | 15,66006 | 4,085376 | 13,3932  | 25,67287 | 4,190165 | 11,94131 |
| 120 | 7,198683 | 15,86683* | 28,28909 | 18,60614 | 21,78496 | -0,04735 | 20,79639 | 24,79787 | 5,470262 | 16,36985 |
| 300 | 6,534658 | -2,51852* | 19,69334 | 17,6616  | 27,31787 | -6,55155 | 27,5151  | 19,12576 | 4,709269 | 1,423507 |
| 600 | 3,806361 | -59,2414* | 10,42545 | 1,195217 | 34,80893 | -12,6813 | 26,51979 | 3,957998 | 4,830408 | -22,9335 |

T+D-

|     |          |          |          |          |          |          |          |          |          |
|-----|----------|----------|----------|----------|----------|----------|----------|----------|----------|
| 30  | 14,03089 | 32,4099  | 22,37596 | 14,80158 | 10,77155 | 18,77622 | 8,441826 | 33,62456 | 17,10379 |
| 120 | 18,73666 | 32,68718 | 30,18659 | 19,68947 | 9,147618 | 27,67812 | -3,29547 | 60,85491 | 22,36301 |
| 300 | 18,1389  | 24,02943 | 31,72651 | 21,63315 | 4,434597 | 26,75764 | -2,39682 | 65,84433 | 20,76381 |
| 600 | 26,2651  | 18,34094 | 30,39013 | 15,48654 | -3,5953  | 46,50622 | 26,64504 | 56,09806 | -8,81311 |

NT

Vitamin D supplementation

|              |          |          |          |          |          |
|--------------|----------|----------|----------|----------|----------|
| Control      | 0,112425 | 0,070951 | 0,063595 | 0,045938 | 0,085642 |
| Testosterone | 0,153989 | 0,070991 | 0,11184  | 0,065262 | 0,104152 |

Vitamin D deficiency

|              |           |          |          |          |          |          |
|--------------|-----------|----------|----------|----------|----------|----------|
| Control      | 0,119715  | 0,135696 | 0,085907 | 0,15082  | 0,122468 | 0,119856 |
| Testosterone | 0,046005* | 0,113317 | 0,09963  | 0,084455 | 0,08969  | 0,092996 |

Resorcin

| T- D+    | <b>T+D+</b> | T- D-    | T+ D-    |
|----------|-------------|----------|----------|
| 0,380532 | 0,324673    | 0,238332 | 0,353097 |
| 0,378942 | 0,329141    | 0,240404 | 0,322175 |
| 0,318136 | 0,328237    | 0,25421  | 0,329035 |
| 0,368868 | 0,341742    | 0,244924 | 0,316932 |
| 0,404422 | 0,386786    | 0,227451 | 0,355764 |
| 0,366934 | 0,354857    |          |          |
